# Supplementary material for: N-Cyanomethylmethanimine tethered anthracene dimer: concise synthesis, conformational properties and photoinduced configurational isomerization
Source: Royal Society of Chemistry journal article supplement (doi:10.1039/d2nj06320d), 2023-01-01
Supplement: d2nj06320d1.pdf [file d2nj06320d1.pdf]

*Supporting Information for*

***N*-cyanomethylmethanimine tethered anthracene dimer: concise synthesis, conformational properties and photoinduced configurational isomerization**

Eyad A. Younes<sup>\*a</sup> Nayyef Aljaar,<sup>a</sup> Maryam F. Abdollahi,<sup>b</sup> Majed Shtaiwi,<sup>a</sup> Maram J. Issa,<sup>a</sup>  
and Yuming Zhao<sup>\*b</sup>

<sup>a</sup>Department of Chemistry, Faculty of science, The Hashemite University, P.O. Box 330127, Zarqa 13133, Jordan. Tel: +962 (5) 3903333 ext. 4572; E-mail: [e.younes@hu.edu.jo](mailto:e.younes@hu.edu.jo)

<sup>b</sup>Department of Chemistry, Memorial University of Newfoundland, St. John's, NL, Canada A1B 3X7. Fax: 1 709 864 3702; Tel: 1 709 864 8747; Email: [yuming@mun.ca](mailto:yuming@mun.ca)

**Table of Content**

|                                                                                                            |      |
|------------------------------------------------------------------------------------------------------------|------|
| 1. NMR Spectra of Compounds <b>1</b> and <b>5 a-d</b>                                                      | S-2  |
| 2. Fluorescence spectra of compound <b>1</b> measured before and after photoirradiation at 365 nm for 1 h. | S-13 |
| 3. Detailed Results of DFT and Calculations                                                                | S-14 |
| 4. Comparison of the molecular structures of (A) <b>TS-1</b> and (B) <b>TS-2</b>                           | S-22 |
| 5. Crystallographic Data and Detailed Refinements for <b>1</b> and <b>5d</b>                               | S-23 |
| 6. Halogen bonding in compound <b>5d</b>                                                                   | S-25 |

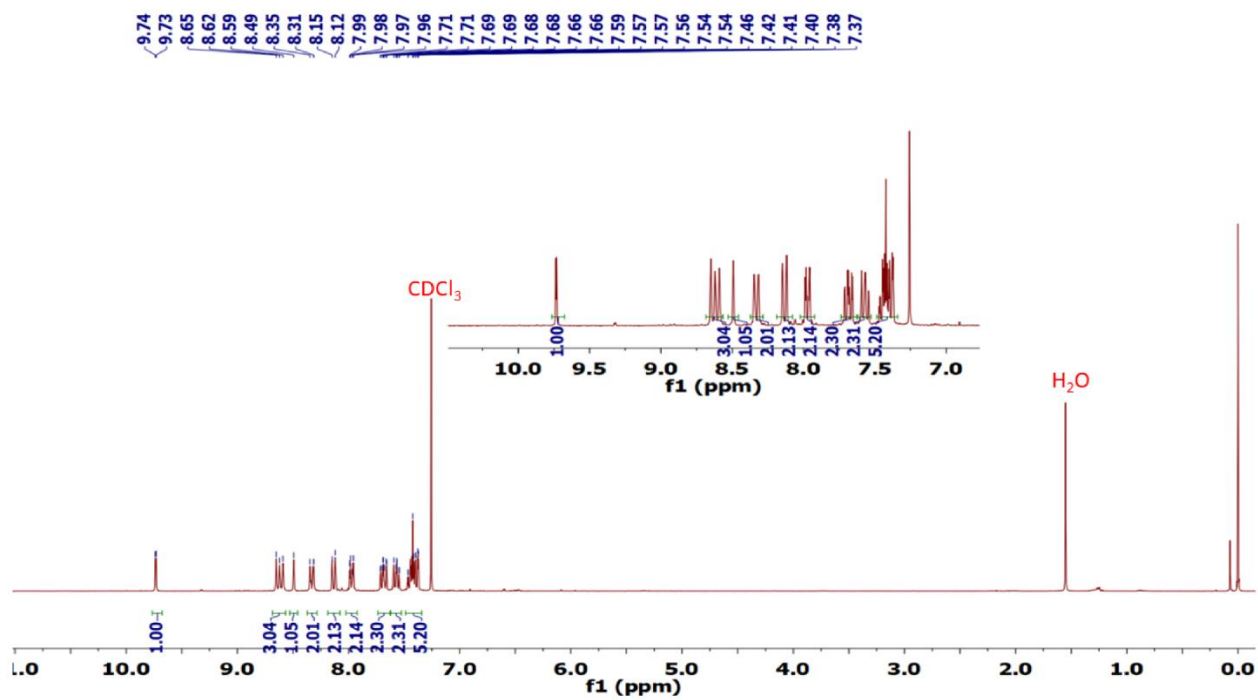

Fig. S-1 <sup>1</sup>H NMR (300 MHz, CDCl<sub>3</sub>) spectrum of compound **1**.

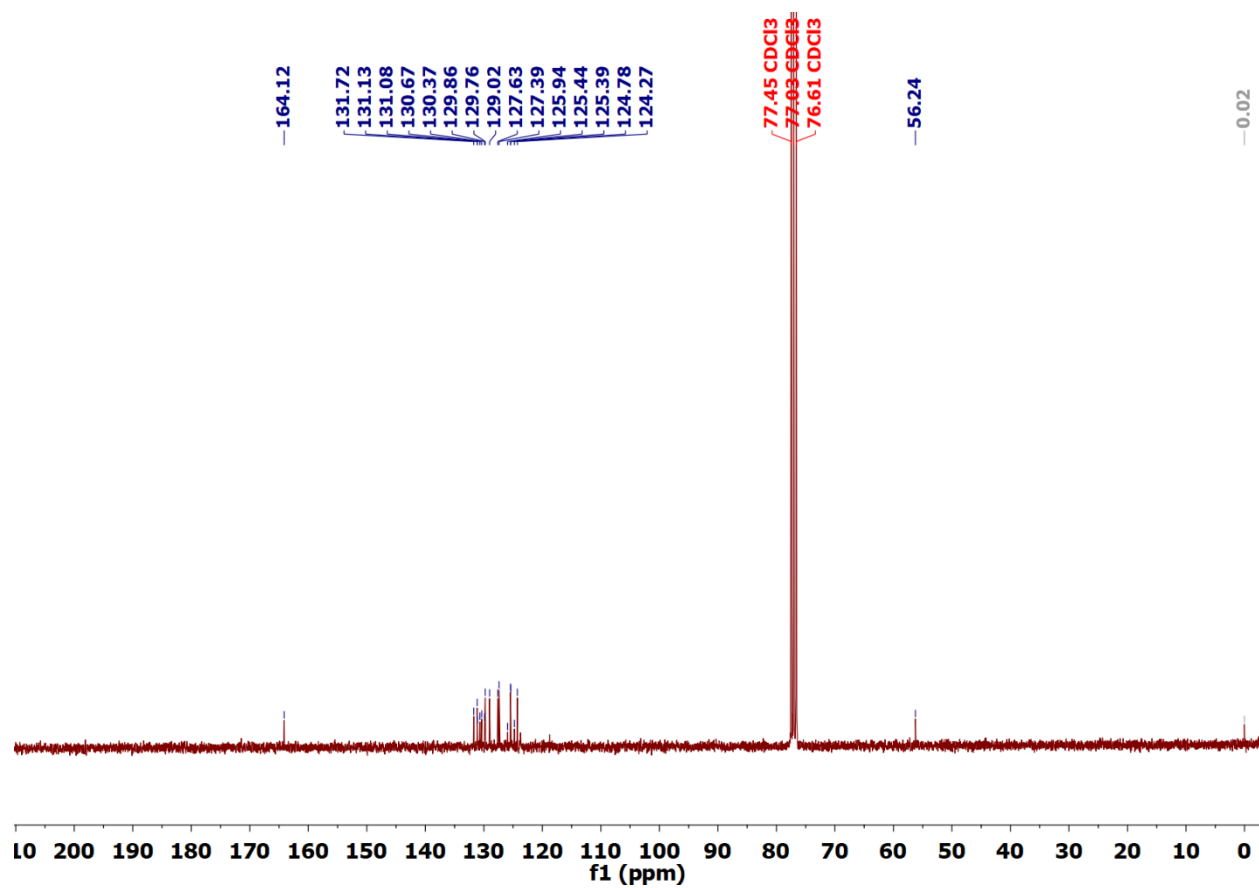

Fig. S-2 <sup>13</sup>C NMR (75 MHz, CDCl<sub>3</sub>) spectrum of compound **1**.

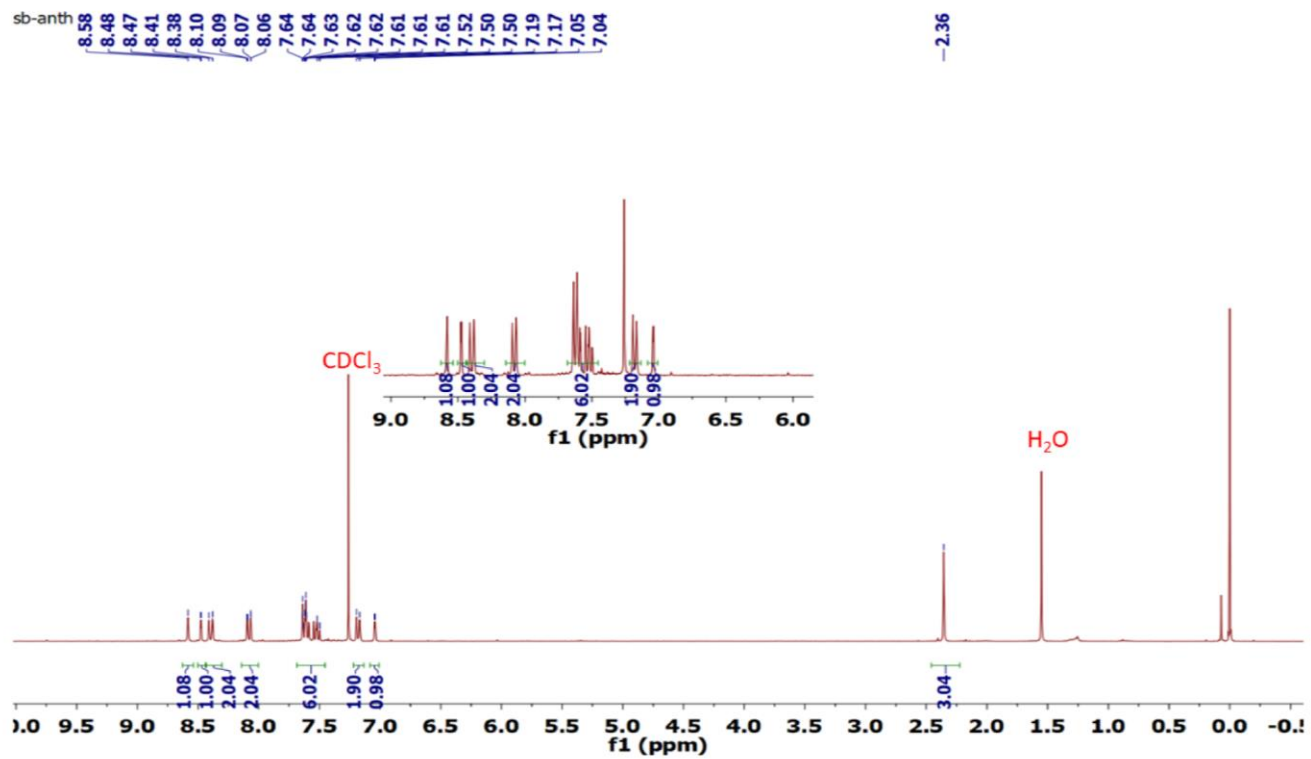

Fig. S-3 <sup>1</sup>H NMR (300 MHz, CDCl<sub>3</sub>) spectrum of compound **5a**.

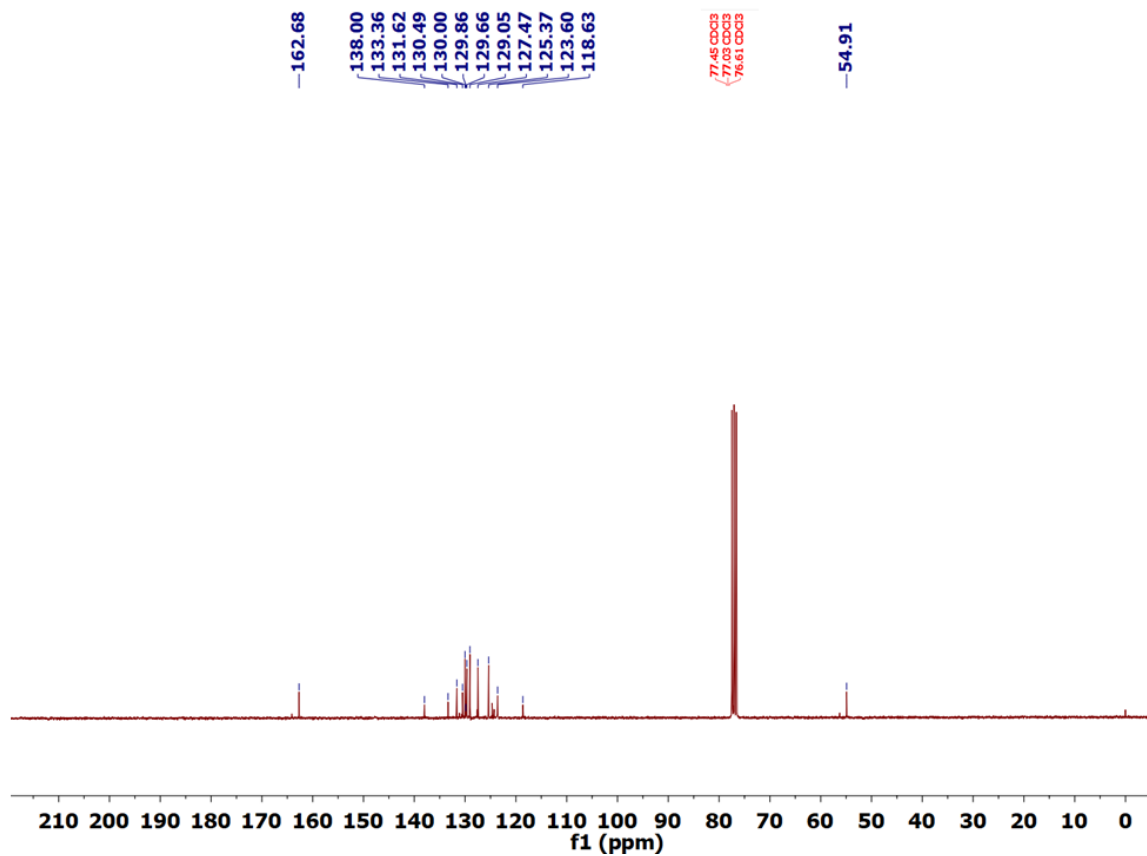

**Fig. S-4**  $^{13}\text{C}$  NMR (75 MHz,  $\text{CDCl}_3$ ) spectrum of compound **5a**.

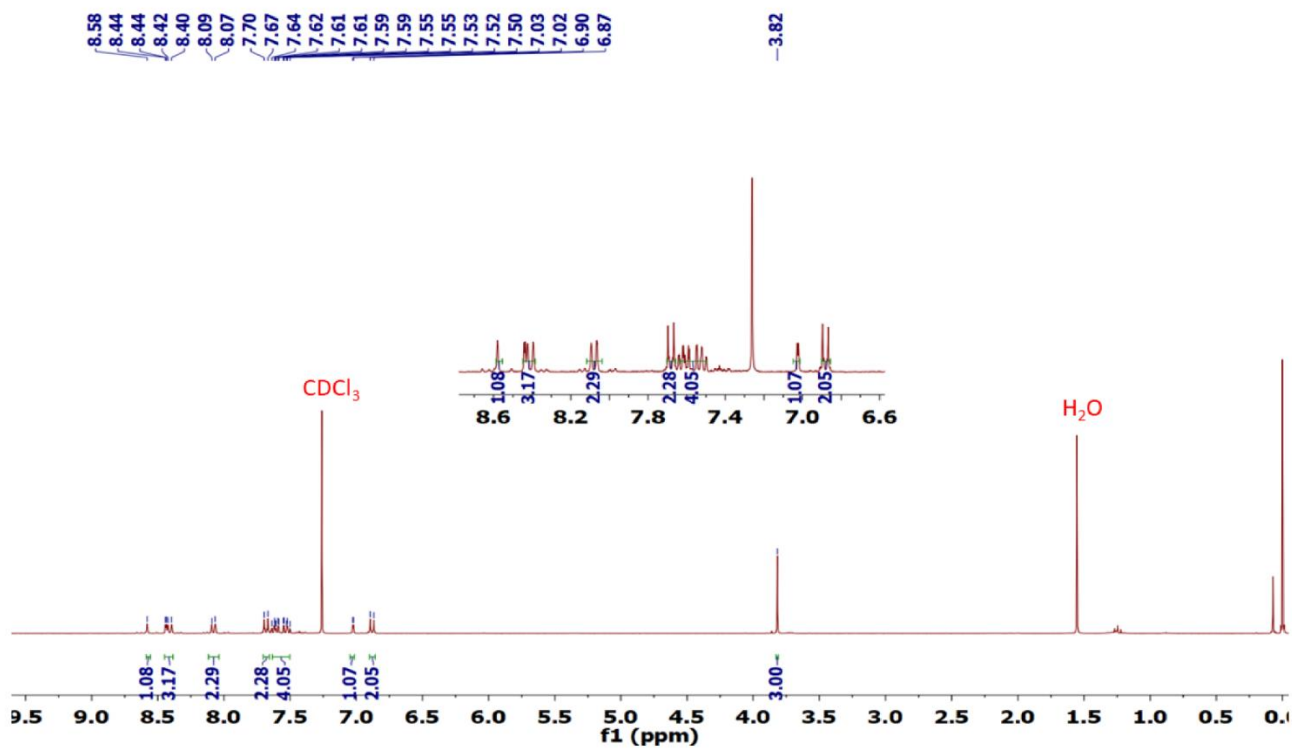

Fig. S-5 <sup>1</sup>H NMR (300 MHz, CDCl<sub>3</sub>) spectrum of compound **5b**.

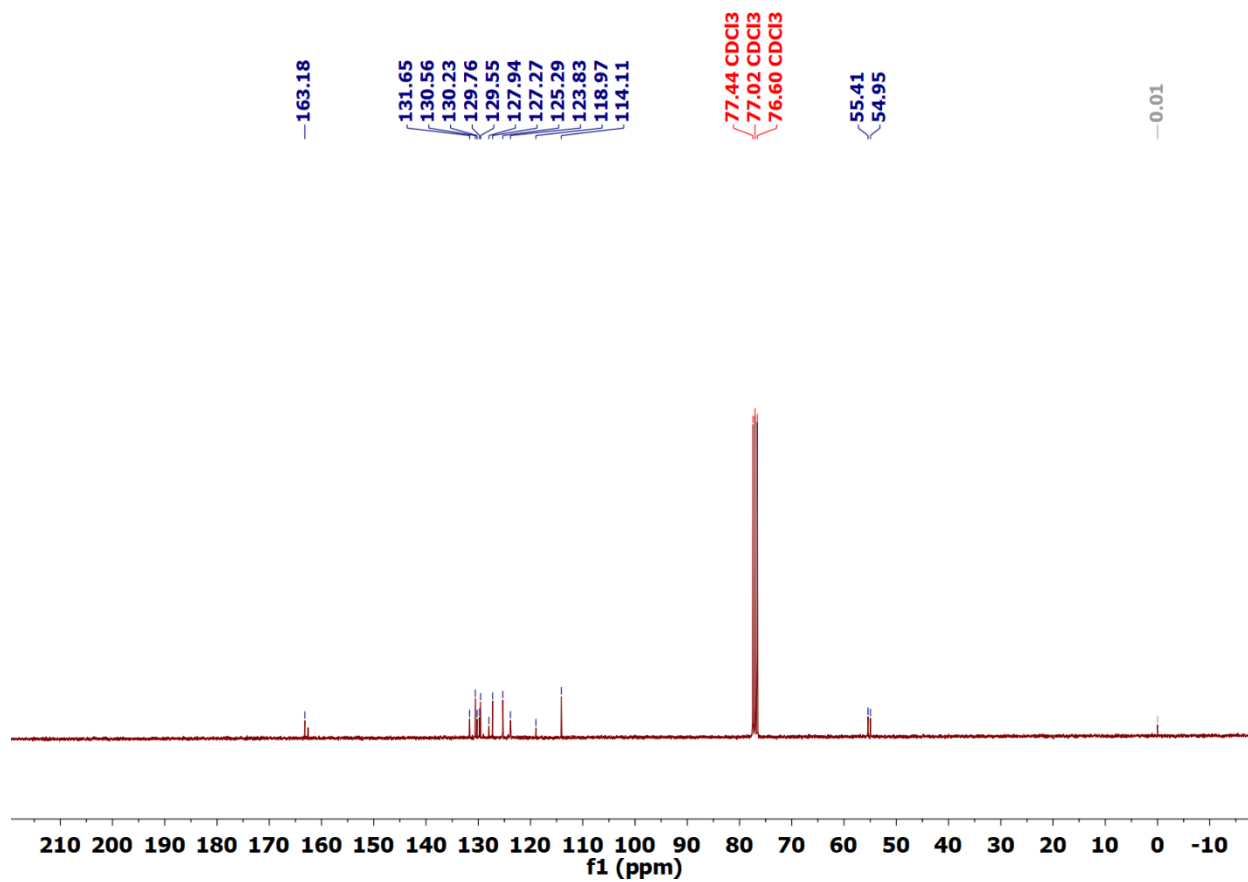

**Fig. S-6**  $^{13}\text{C}$  NMR (75 MHz,  $\text{CDCl}_3$ ) spectrum of compound **5b**.

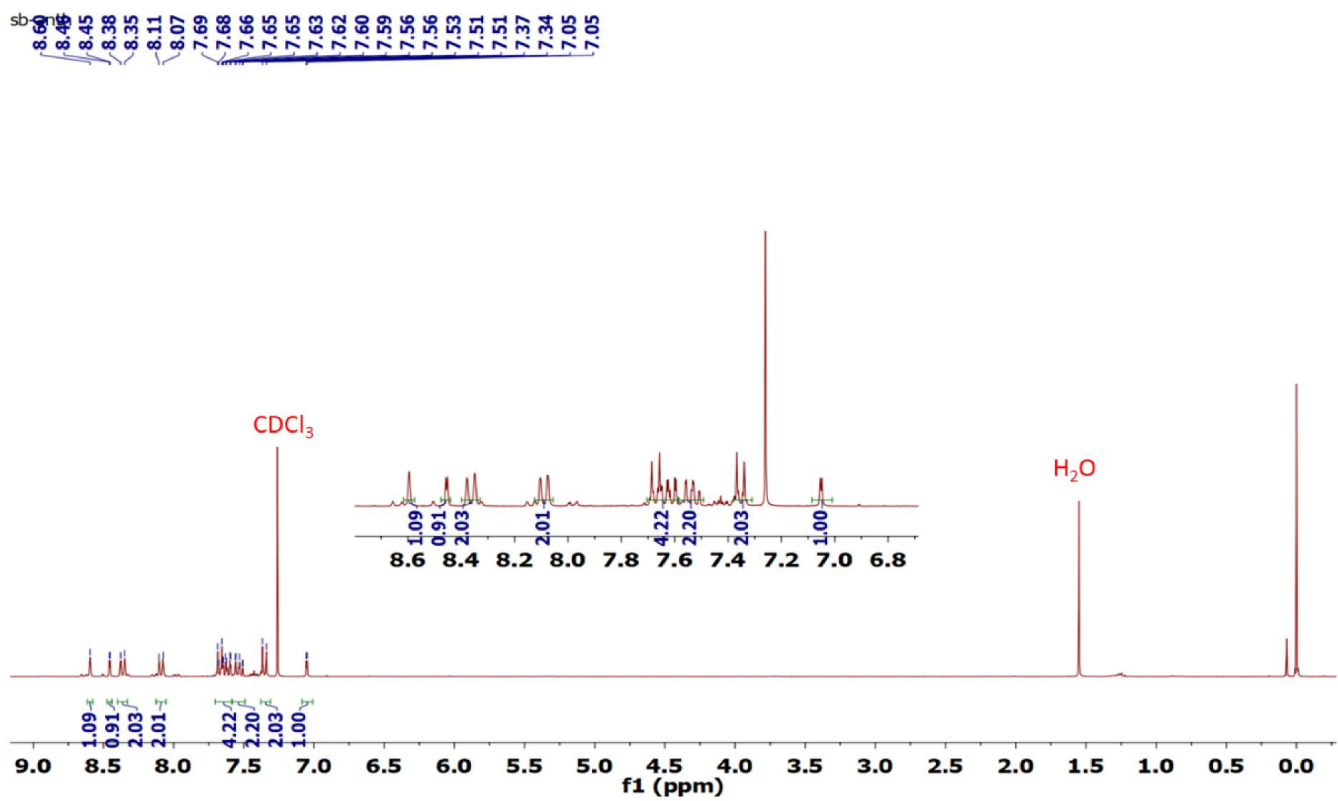

Fig. S-7  $^1\text{H}$  NMR (300 MHz,  $\text{CDCl}_3$ ) spectrum of compound **5c**.



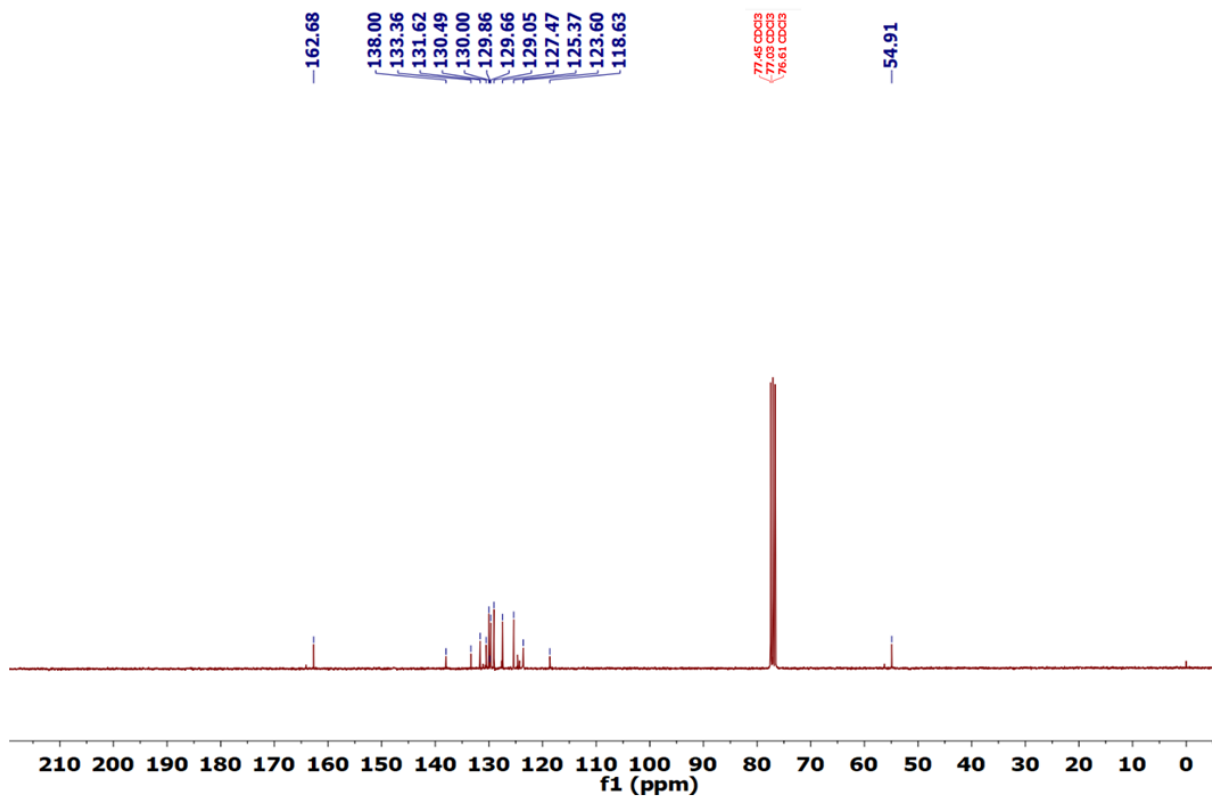

**Fig. S-8**  $^{13}\text{C}$  NMR (75 MHz,  $\text{CDCl}_3$ ) spectrum of compound 5c.

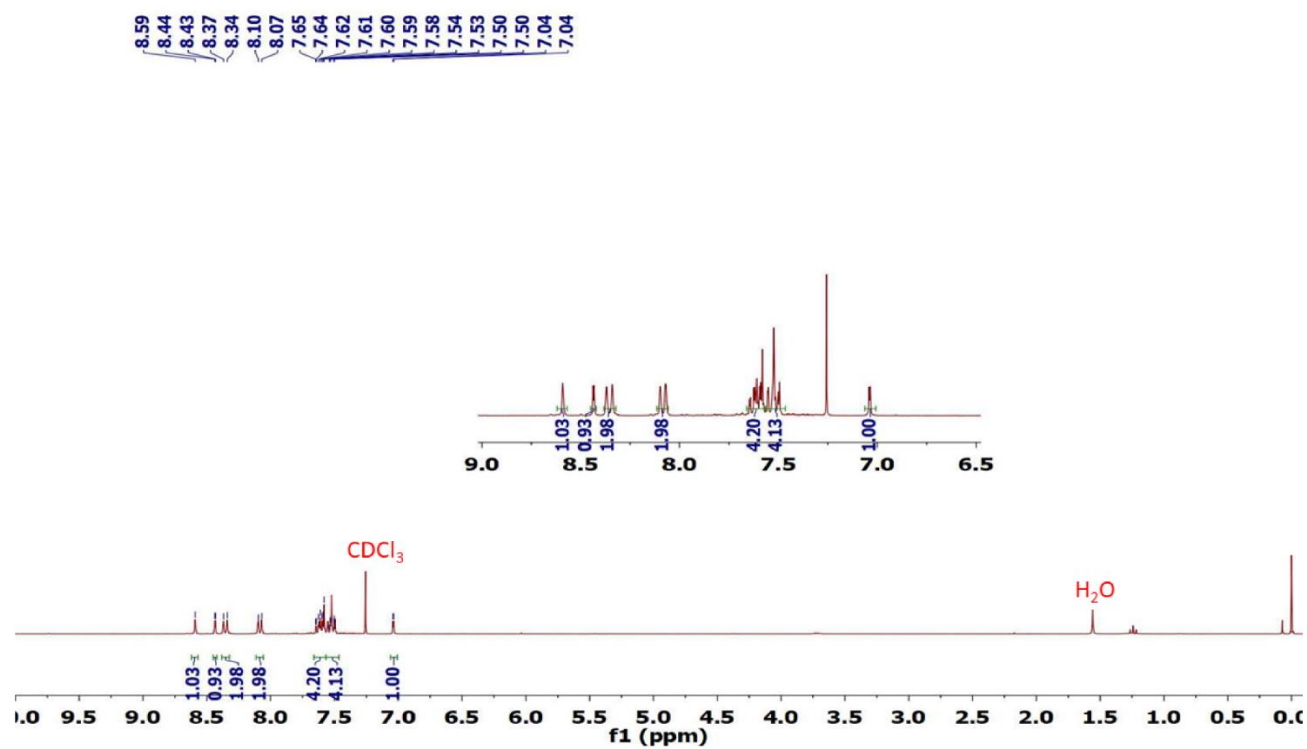

Fig. S-9  $^1\text{H}$  NMR (300 MHz,  $\text{CDCl}_3$ ) spectrum of compound **5d**.

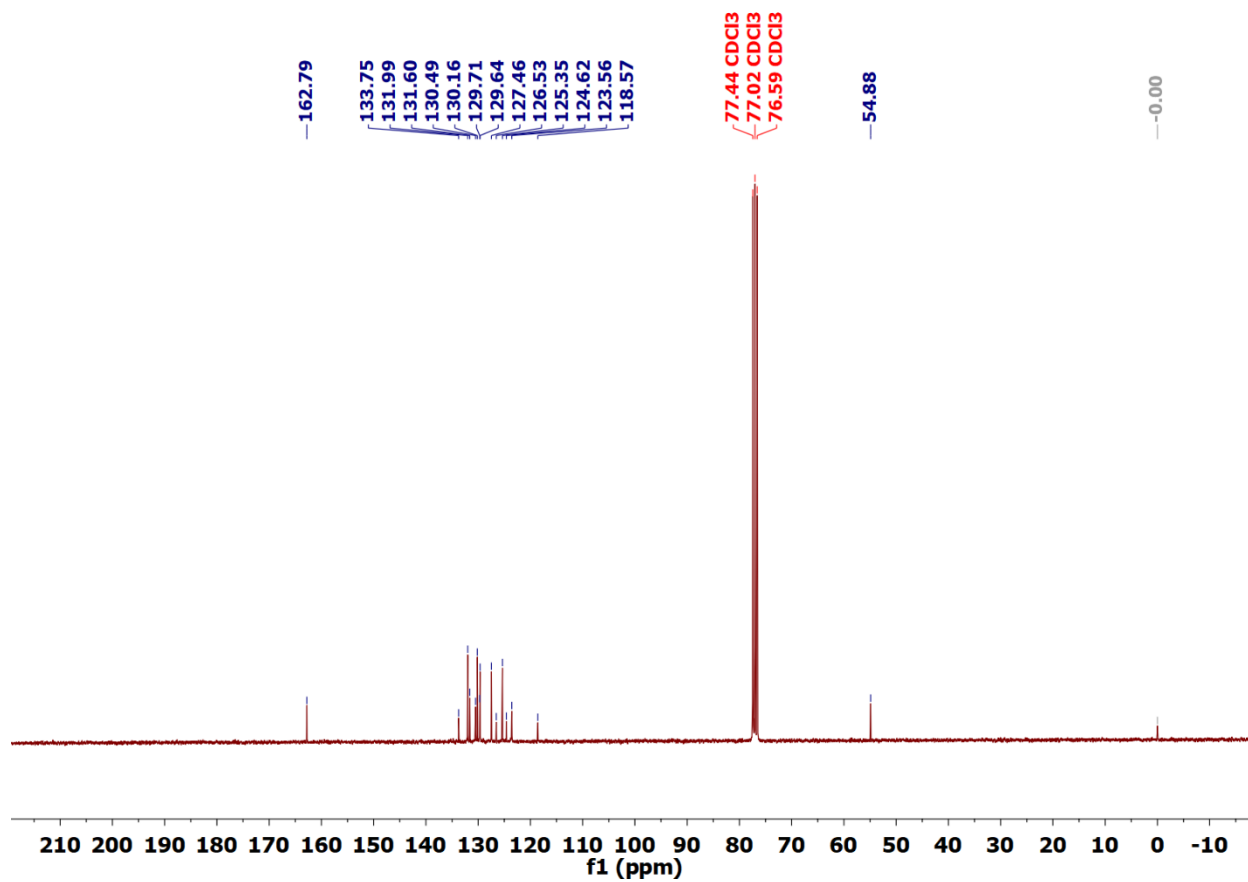

Fig. S-10  $^{13}\text{C}$  NMR (75 MHz,  $\text{CDCl}_3$ ) spectrum of compound **5d**.

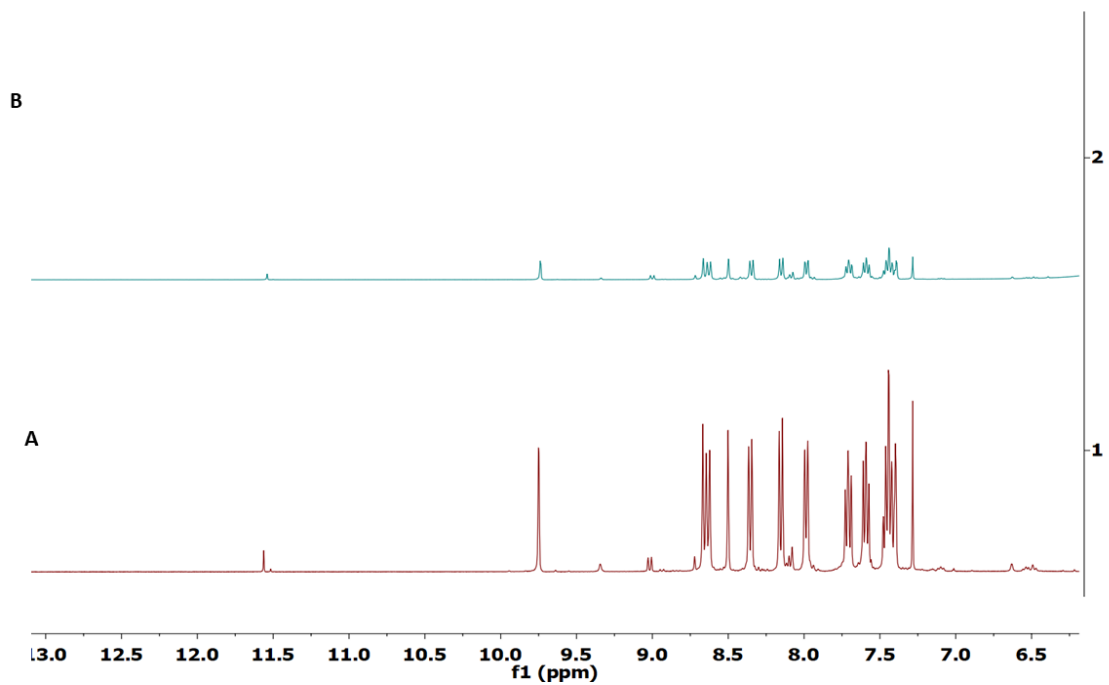

**Fig. S-11** <sup>1</sup>H NMR (400 MHz, CDCl<sub>3</sub>) spectra of (A) anthracene dimer **1**. (B) A mixture of **1** and hydrogen peroxide in CDCl<sub>3</sub> after mixing for 24 hours.

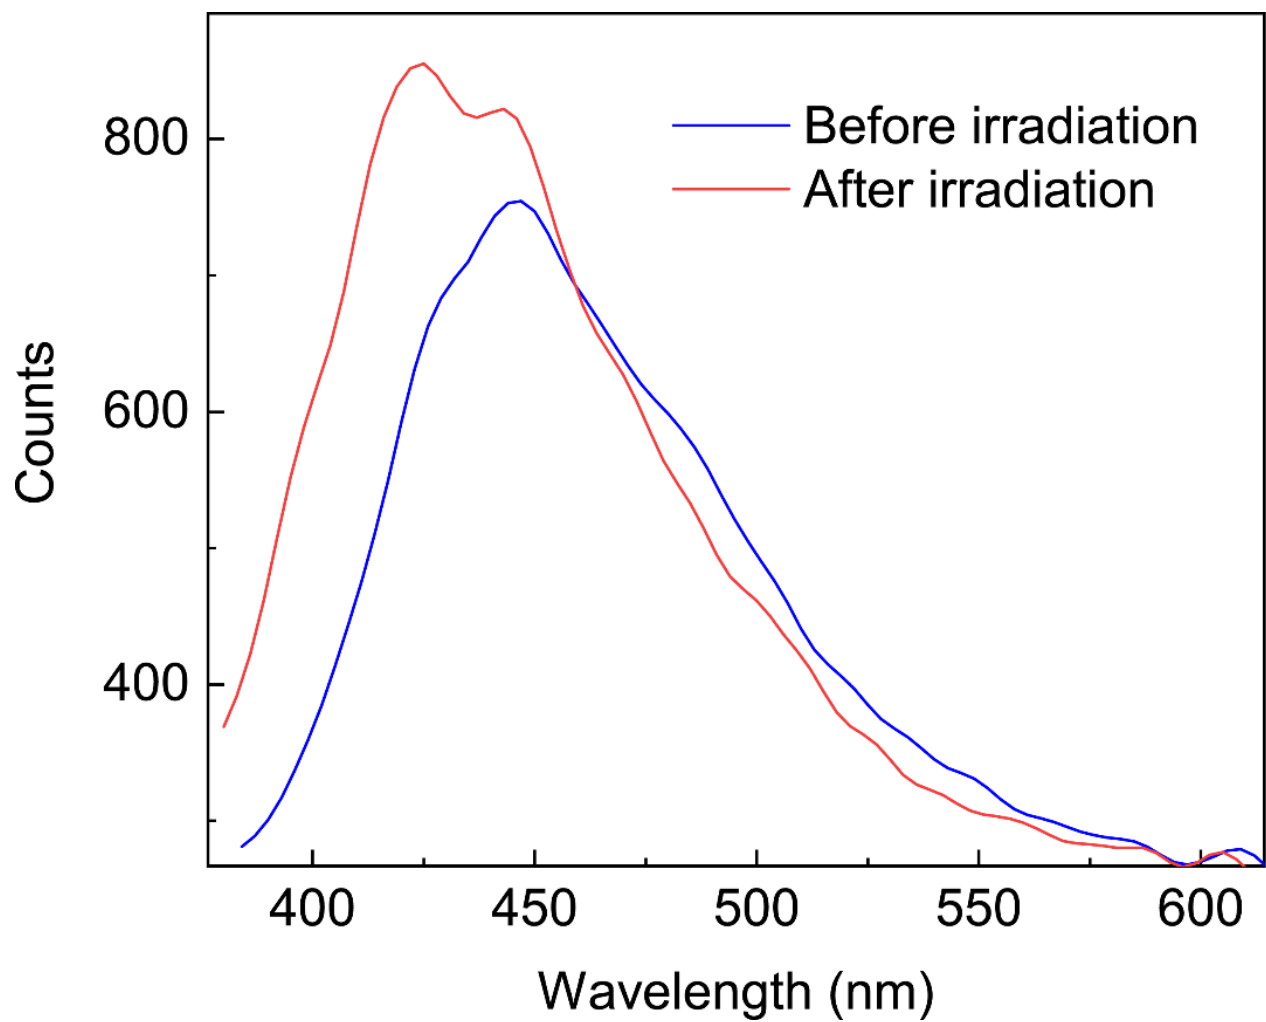

**Figure S-12:** Fluorescence spectra of compound **1** (2.0 mM in CH<sub>2</sub>Cl<sub>2</sub>, rt) measured before and after photoirradiation at 365 nm for 1 h.

## Detailed Results of DFT Calculations

Cartesian coordinates and optimized *cis*-1-conformer-1 in gas phase:  $E(\text{RM062X}) = -1301.363980$  hartees; Dipole Moment = 5. 6.283323 Debye; Basis Set = def2SVP.

|   |           |           |           |
|---|-----------|-----------|-----------|
| N | 1.032300  | 4.734600  | 0.653300  |
| N | 0.411500  | 2.327000  | -1.679300 |
| C | 0.511400  | 1.296700  | 0.640000  |
| C | -0.431900 | 0.629400  | 1.452300  |
| C | -1.780200 | 1.081900  | 1.647900  |
| H | -2.109700 | 2.030600  | 1.226300  |
| C | -2.676400 | 0.357200  | 2.382700  |
| H | -3.692400 | 0.732600  | 2.513100  |
| C | -2.301500 | -0.881200 | 2.980000  |
| H | -3.035000 | -1.451300 | 3.551800  |
| C | -1.019800 | -1.332500 | 2.851800  |
| H | -0.706000 | -2.267000 | 3.322000  |
| C | -0.044100 | -0.590500 | 2.110900  |
| C | 1.270200  | -1.047900 | 2.002800  |
| H | 1.553600  | -1.981400 | 2.494900  |
| C | 2.233900  | -0.333200 | 1.288500  |
| C | 3.587100  | -0.792900 | 1.212600  |
| H | 3.851500  | -1.708100 | 1.746400  |
| C | 4.522200  | -0.105300 | 0.493900  |
| H | 5.553000  | -0.459400 | 0.446700  |
| C | 4.152900  | 1.086300  | -0.196000 |
| H | 4.907800  | 1.637200  | -0.758700 |
| C | 2.867600  | 1.552600  | -0.156900 |
| H | 2.614400  | 2.464500  | -0.698200 |
| C | 1.853500  | 0.864500  | 0.591100  |
| C | 0.077900  | 2.456500  | -0.256200 |
| H | -1.015600 | 2.558000  | -0.196700 |
| C | 0.619400  | 3.740000  | 0.242300  |
| C | 0.144800  | 1.250700  | -2.297400 |
| H | 0.433100  | 1.229700  | -3.360600 |
| C | -0.493500 | 0.017400  | -1.746200 |
| C | -1.860300 | 0.016700  | -1.409500 |
| C | -2.715200 | 1.143400  | -1.647200 |
| H | -2.302100 | 2.026300  | -2.140800 |
| C | -4.034400 | 1.115200  | -1.287000 |
| H | -4.669800 | 1.979600  | -1.485300 |
| C | -4.593700 | -0.039500 | -0.663400 |
| H | -5.648300 | -0.042900 | -0.384600 |
| C | -3.812800 | -1.133600 | -0.421500 |
| H | -4.229800 | -2.022700 | 0.056200  |
| C | -2.427800 | -1.146800 | -0.784100 |
| C | -1.615300 | -2.252800 | -0.520200 |
| H | -2.044700 | -3.120900 | -0.014100 |
| C | -0.266200 | -2.272000 | -0.887300 |
| C | 0.575800  | -3.394400 | -0.601400 |

|   |          |           |           |
|---|----------|-----------|-----------|
| H | 0.136400 | -4.255600 | -0.093600 |
| C | 1.895000 | -3.391000 | -0.957600 |
| H | 2.526000 | -4.253000 | -0.735700 |
| C | 2.455800 | -2.262800 | -1.626600 |
| H | 3.509900 | -2.272000 | -1.906900 |
| C | 1.688800 | -1.165500 | -1.902300 |
| H | 2.137300 | -0.297600 | -2.389100 |
| C | 0.304000 | -1.126200 | -1.537800 |

Cartesian coordinates and optimized *cis*-1-conformer-2 in gas phase:  $E(\text{RM062X}) = -1301.359965$  hartees; Dipole Moment = 6.143276Debye; Basis Set = def2SVP.

|   |           |           |           |
|---|-----------|-----------|-----------|
| N | 1.436200  | 4.188000  | 1.682500  |
| N | 0.374300  | 2.435800  | -1.049600 |
| C | 1.131600  | 0.845700  | 0.722300  |
| C | 0.463000  | -0.192700 | 1.407000  |
| C | -0.867700 | -0.082900 | 1.937900  |
| H | -1.415800 | 0.856500  | 1.877000  |
| C | -1.487500 | -1.143500 | 2.536200  |
| H | -2.501300 | -1.021300 | 2.921600  |
| C | -0.834500 | -2.404400 | 2.658300  |
| H | -1.350800 | -3.239900 | 3.132700  |
| C | 0.439100  | -2.550300 | 2.192500  |
| H | 0.964100  | -3.503100 | 2.285600  |
| C | 1.128000  | -1.460500 | 1.568500  |
| C | 2.435400  | -1.620600 | 1.107300  |
| H | 2.931000  | -2.586000 | 1.237200  |
| C | 3.121300  | -0.580700 | 0.479100  |
| C | 4.462500  | -0.759600 | 0.010300  |
| H | 4.945700  | -1.723300 | 0.184000  |
| C | 5.119200  | 0.246800  | -0.635500 |
| H | 6.141400  | 0.103200  | -0.988200 |
| C | 4.466200  | 1.496800  | -0.850100 |
| H | 4.997900  | 2.298100  | -1.364900 |
| C | 3.186200  | 1.707400  | -0.419500 |
| H | 2.709300  | 2.667400  | -0.613200 |
| C | 2.457800  | 0.677400  | 0.268500  |
| C | 0.397400  | 2.145000  | 0.389400  |
| H | -0.636000 | 2.075800  | 0.754100  |
| C | 0.989900  | 3.296100  | 1.104600  |
| C | -0.342200 | 1.706900  | -1.800700 |
| H | -0.312900 | 1.948600  | -2.875500 |
| C | -1.207100 | 0.555600  | -1.391900 |
| C | -2.493200 | 0.791300  | -0.871500 |
| C | -3.019500 | 2.114300  | -0.689500 |
| H | -2.412300 | 2.972000  | -0.986900 |
| C | -4.258400 | 2.308000  | -0.146400 |
| H | -4.639000 | 3.321300  | -0.010700 |

|   |           |           |           |
|---|-----------|-----------|-----------|
| C | -5.066400 | 1.196500  | 0.242300  |
| H | -6.053600 | 1.373300  | 0.670900  |
| C | -4.604800 | -0.077700 | 0.076600  |
| H | -5.214500 | -0.934300 | 0.371300  |
| C | -3.307000 | -0.326900 | -0.476000 |
| C | -2.799900 | -1.622600 | -0.597000 |
| H | -3.412000 | -2.468100 | -0.273100 |
| C | -1.513200 | -1.861200 | -1.089500 |
| C | -0.966500 | -3.183200 | -1.155000 |
| H | -1.586200 | -4.017400 | -0.819800 |
| C | 0.302600  | -3.394000 | -1.612800 |
| H | 0.711800  | -4.404600 | -1.651200 |
| C | 1.103900  | -2.293900 | -2.042900 |
| H | 2.120100  | -2.473700 | -2.397700 |
| C | 0.617700  | -1.017600 | -2.000900 |
| H | 1.249500  | -0.182300 | -2.310600 |
| C | -0.705500 | -0.753400 | -1.517000 |

Cartesian coordinates and optimized *cis*-1-conformer-3 in gas phase:  $E(\text{RM062X}) = -1301.356251$  hartees; Dipole Moment = 4.874153 Debye; Basis Set = def2SVP.

|   |           |           |           |
|---|-----------|-----------|-----------|
| N | 2.428000  | 3.725900  | 0.505900  |
| N | -0.085600 | 2.630200  | -1.369800 |
| C | -0.382600 | 1.366900  | 0.845500  |
| C | 0.443500  | 0.434900  | 1.521100  |
| C | 1.862000  | 0.576700  | 1.700500  |
| H | 2.377500  | 1.462700  | 1.348300  |
| C | 2.609500  | -0.389000 | 2.315400  |
| H | 3.683900  | -0.236500 | 2.427300  |
| C | 2.014100  | -1.587800 | 2.800200  |
| H | 2.631400  | -2.349900 | 3.277800  |
| C | 0.668200  | -1.763500 | 2.670800  |
| H | 0.181100  | -2.666500 | 3.045000  |
| C | -0.154200 | -0.767000 | 2.051300  |
| C | -1.528700 | -0.972100 | 1.946100  |
| H | -1.964200 | -1.890800 | 2.346200  |
| C | -2.360600 | -0.029000 | 1.343700  |
| C | -3.772000 | -0.249700 | 1.262400  |
| H | -4.174600 | -1.162700 | 1.705800  |
| C | -4.591500 | 0.651500  | 0.647000  |
| H | -5.667100 | 0.478400  | 0.592800  |
| C | -4.031300 | 1.823700  | 0.064000  |
| H | -4.684400 | 2.539300  | -0.437900 |
| C | -2.685500 | 2.064800  | 0.117000  |
| H | -2.303700 | 2.956900  | -0.378800 |
| C | -1.784200 | 1.157400  | 0.775100  |
| C | 0.083700  | 2.619900  | 0.098300  |
| H | -0.572100 | 3.432300  | 0.449100  |
| C | 1.418700  | 3.187100  | 0.363000  |
| C | 0.040500  | 1.585500  | -2.078800 |
| H | -0.140600 | 1.735400  | -3.156600 |



|   |           |           |           |
|---|-----------|-----------|-----------|
| C | 0.395800  | 0.193400  | -1.668100 |
| C | -0.621000 | -0.779800 | -1.599700 |
| C | -1.980000 | -0.489500 | -1.947700 |
| H | -2.234500 | 0.506100  | -2.316100 |
| C | -2.958100 | -1.433800 | -1.806700 |
| H | -3.988100 | -1.192400 | -2.073200 |
| C | -2.647200 | -2.729600 | -1.297400 |
| H | -3.443200 | -3.466300 | -1.179000 |
| C | -1.359900 | -3.048900 | -0.968900 |
| H | -1.110600 | -4.041700 | -0.588200 |
| C | -0.302400 | -2.095400 | -1.122100 |
| C | 1.021400  | -2.405600 | -0.796400 |
| H | 1.261100  | -3.405100 | -0.425300 |
| C | 2.047100  | -1.466700 | -0.937400 |
| C | 3.405800  | -1.791300 | -0.624900 |
| H | 3.630000  | -2.805100 | -0.286400 |
| C | 4.396300  | -0.858000 | -0.743600 |
| H | 5.428300  | -1.117900 | -0.503400 |
| C | 4.087500  | 0.464100  | -1.180700 |
| H | 4.884400  | 1.203900  | -1.267700 |
| C | 2.802300  | 0.814800  | -1.487900 |
| H | 2.583700  | 1.831200  | -1.820300 |
| C | 1.733800  | -0.134800 | -1.379800 |

Cartesian coordinates and optimized *cis*-1-conformer-4 in gas phase: *E*(RM062X) -1301.353049 hartees; Dipole Moment = 6.205087 Debye; Basis Set = def2SVP.

|   |           |           |           |
|---|-----------|-----------|-----------|
| N | -1.396600 | 4.719400  | -0.481800 |
| N | 0.029100  | 2.092400  | -2.069200 |
| C | -0.982400 | 1.355900  | 0.211400  |
| C | -2.106500 | 0.606300  | 0.619000  |
| C | -3.416300 | 0.760900  | 0.049900  |
| H | -3.595800 | 1.523400  | -0.708400 |
| C | -4.471800 | 0.005200  | 0.474900  |
| H | -5.459400 | 0.164800  | 0.039500  |
| C | -4.303300 | -0.982400 | 1.490600  |
| H | -5.156500 | -1.582900 | 1.808700  |
| C | -3.081100 | -1.154100 | 2.070800  |
| H | -2.936500 | -1.892800 | 2.861900  |
| C | -1.955700 | -0.359900 | 1.675300  |
| C | -0.713200 | -0.515100 | 2.293000  |
| H | -0.589500 | -1.283600 | 3.060100  |
| C | 0.365300  | 0.315100  | 1.977700  |
| C | 1.625300  | 0.189100  | 2.646500  |
| H | 1.737400  | -0.597600 | 3.395600  |
| C | 2.656000  | 1.037900  | 2.364600  |
| H | 3.612300  | 0.934500  | 2.879100  |
| C | 2.479400  | 2.080200  | 1.406400  |
| H | 3.296700  | 2.778100  | 1.217900  |
| C | 1.308700  | 2.206100  | 0.714300  |

|   |           |           |           |
|---|-----------|-----------|-----------|
| H | 1.200200  | 3.005800  | -0.019400 |
| C | 0.213800  | 1.310100  | 0.952500  |
| C | -1.036800 | 2.178000  | -1.075300 |
| H | -1.942700 | 1.878600  | -1.624500 |
| C | -1.233600 | 3.612000  | -0.757600 |
| C | 0.811400  | 1.112300  | -2.274000 |
| H | 1.538400  | 1.282400  | -3.084900 |
| C | 0.939800  | -0.204900 | -1.587000 |
| C | -0.158500 | -1.081200 | -1.490200 |
| C | -1.392500 | -0.847900 | -2.180900 |
| H | -1.466600 | 0.009000  | -2.853100 |
| C | -2.456900 | -1.688800 | -2.022200 |
| H | -3.389300 | -1.493000 | -2.553600 |
| C | -2.367000 | -2.822000 | -1.159400 |
| H | -3.236800 | -3.466200 | -1.024900 |
| C | -1.192500 | -3.107800 | -0.525200 |
| H | -1.103500 | -3.988500 | 0.114400  |
| C | -0.044800 | -2.266700 | -0.686300 |
| C | 1.178000  | -2.572800 | -0.082800 |
| H | 1.259200  | -3.473400 | 0.531000  |
| C | 2.303800  | -1.764900 | -0.262400 |
| C | 3.567300  | -2.108200 | 0.319200  |
| H | 3.633800  | -3.027100 | 0.905200  |
| C | 4.661900  | -1.313700 | 0.139100  |
| H | 5.621500  | -1.589100 | 0.578700  |
| C | 4.554500  | -0.113600 | -0.625400 |
| H | 5.434800  | 0.516300  | -0.761900 |
| C | 3.361100  | 0.260300  | -1.175600 |
| H | 3.295300  | 1.198500  | -1.727400 |
| C | 2.189900  | -0.555200 | -1.030700 |

Cartesian coordinates and optimized *trans-conformer* in gas phase:  $E(\text{RM062X}) = -1301.349754$  hartrees; Dipole Moment = 6.4959290 Debye; Basis Set = def2SVP.

|   |           |           |           |
|---|-----------|-----------|-----------|
| N | 1.701600  | -3.018900 | -2.826800 |
| N | -0.116900 | -0.866800 | -0.901600 |
| C | 2.273600  | -0.388600 | -0.567500 |
| C | 2.581800  | -1.271300 | 0.491800  |
| C | 1.899300  | -2.518400 | 0.696600  |
| H | 1.073100  | -2.793500 | 0.044500  |
| C | 2.247000  | -3.350600 | 1.722800  |
| H | 1.710100  | -4.290500 | 1.856400  |
| C | 3.293700  | -3.006400 | 2.628300  |
| H | 3.554200  | -3.688900 | 3.438200  |
| C | 3.955000  | -1.822600 | 2.482800  |
| H | 4.751400  | -1.535900 | 3.172200  |
| C | 3.619600  | -0.920300 | 1.422500  |
| C | 4.282300  | 0.300000  | 1.283100  |
| H | 5.068800  | 0.564300  | 1.994000  |

|   |           |           |           |
|---|-----------|-----------|-----------|
| C | 3.959400  | 1.195500  | 0.263800  |
| C | 4.642000  | 2.451200  | 0.160100  |
| H | 5.415700  | 2.675400  | 0.897100  |
| C | 4.336800  | 3.343000  | -0.824400 |
| H | 4.861300  | 4.296600  | -0.893300 |
| C | 3.322900  | 3.020000  | -1.772900 |
| H | 3.080100  | 3.731900  | -2.563200 |
| C | 2.654400  | 1.829800  | -1.713000 |
| H | 1.897200  | 1.639300  | -2.471300 |
| C | 2.933600  | 0.854800  | -0.691200 |
| C | 1.180000  | -0.770600 | -1.561900 |
| H | 1.148700  | -0.021500 | -2.365200 |
| C | 1.479600  | -2.043100 | -2.254800 |
| C | -0.869200 | 0.151500  | -0.991300 |
| H | -0.539900 | 1.039400  | -1.563800 |
| C | -2.204100 | 0.268100  | -0.367100 |
| C | -2.567800 | 1.533200  | 0.156400  |
| C | -1.665500 | 2.649600  | 0.202100  |
| H | -0.639500 | 2.536700  | -0.147800 |
| C | -2.055200 | 3.855700  | 0.714200  |
| H | -1.345800 | 4.684100  | 0.739700  |
| C | -3.371000 | 4.043100  | 1.230600  |
| H | -3.660700 | 5.013900  | 1.634400  |
| C | -4.253100 | 3.002400  | 1.229600  |
| H | -5.259800 | 3.121700  | 1.634800  |
| C | -3.882500 | 1.722900  | 0.704000  |
| C | -4.775800 | 0.650300  | 0.723300  |
| H | -5.775000 | 0.797200  | 1.140800  |
| C | -4.425700 | -0.606500 | 0.225600  |
| C | -5.364600 | -1.688000 | 0.257200  |
| H | -6.349200 | -1.503200 | 0.691100  |
| C | -5.038600 | -2.913200 | -0.244900 |
| H | -5.759100 | -3.731700 | -0.217900 |
| C | -3.748900 | -3.122900 | -0.815500 |
| H | -3.497300 | -4.102400 | -1.224800 |
| C | -2.821500 | -2.119500 | -0.858900 |
| H | -1.840100 | -2.308800 | -1.284800 |
| C | -3.115500 | -0.816500 | -0.333300 |

Cartesian coordinates and optimized *TS1* in gas phase:  $E(\text{RM062X}) = -1301.306319$  hartrees;  
Dipole Moment = 3.787525 Debye; Basis Set = def2SVP.

|   |           |           |           |
|---|-----------|-----------|-----------|
| C | 0.995200  | -0.633200 | 1.415800  |
| H | 1.213600  | -1.541700 | 2.007700  |
| C | 0.702300  | 0.361600  | 2.498200  |
| N | 0.405600  | 1.036100  | 3.385300  |
| N | -0.083000 | -0.893800 | 0.578300  |
| C | -1.042000 | -1.170900 | -0.164500 |
| H | -1.008800 | -2.065500 | -0.827600 |
| H | -0.166500 | 3.663800  | -0.859900 |
| C | -1.106600 | 3.123200  | -0.734900 |

|   |           |           |           |
|---|-----------|-----------|-----------|
| H | -0.129000 | 1.241600  | -0.601100 |
| C | -1.082700 | 1.765900  | -0.580500 |
| C | -3.520200 | 3.159600  | -0.631500 |
| C | -2.295000 | 1.015000  | -0.422800 |
| C | -2.342000 | 3.837300  | -0.746700 |
| C | -3.539400 | 1.734900  | -0.479400 |
| C | -2.315600 | -0.387600 | -0.260900 |
| H | -2.338500 | 4.921900  | -0.862900 |
| H | -5.686900 | 1.588600  | -0.442500 |
| H | -4.474900 | 3.688600  | -0.658600 |
| C | -3.541400 | -1.084900 | -0.193500 |
| C | -3.615400 | -2.508000 | -0.018000 |
| C | -4.777700 | -0.355200 | -0.267800 |
| H | -6.946600 | -0.494100 | -0.248700 |
| C | -4.745600 | 1.035100  | -0.398500 |
| C | -4.819400 | -3.150900 | 0.048700  |
| H | -2.696900 | -3.086600 | 0.077300  |
| H | -4.848600 | -4.233500 | 0.180800  |
| C | -6.042900 | -2.422700 | -0.042000 |
| H | -6.993200 | -2.954600 | 0.016500  |
| C | -6.018600 | -1.066400 | -0.189900 |
| H | 2.662000  | -4.936700 | -0.081900 |
| C | 3.089400  | -3.940600 | -0.205900 |
| H | 1.438300  | -3.003500 | 0.733500  |
| C | 2.411800  | -2.852200 | 0.268500  |
| C | 4.864500  | -2.547900 | -1.057600 |
| C | 2.934600  | -1.522600 | 0.115200  |
| C | 4.341800  | -3.793900 | -0.870500 |
| C | 4.178600  | -1.382000 | -0.587800 |
| C | 2.276300  | -0.370800 | 0.608100  |
| H | 4.868700  | -4.676600 | -1.234600 |
| H | 5.654200  | -0.000700 | -1.328700 |
| H | 5.815900  | -2.411900 | -1.575600 |
| C | 2.773600  | 0.919500  | 0.323500  |
| C | 2.105400  | 2.146200  | 0.670200  |
| C | 4.026000  | 1.038900  | -0.385400 |
| H | 5.521700  | 2.391400  | -1.191100 |
| C | 4.701900  | -0.105800 | -0.803600 |
| C | 2.648000  | 3.363200  | 0.368600  |
| H | 1.140500  | 2.125000  | 1.169600  |
| H | 2.108500  | 4.269800  | 0.648000  |
| C | 3.903500  | 3.469500  | -0.299700 |
| H | 4.320600  | 4.452800  | -0.520000 |
| C | 4.566000  | 2.336900  | -0.666100 |

Cartesian coordinates and optimized *TS2* in gas phase:  $E(\text{RM062X}) = -1301.349754$  hartrees;  
Dipole Moment = 4.787560 Debye; Basis Set = def2SVP.

|   |           |          |           |
|---|-----------|----------|-----------|
| H | -0.481500 | 2.730500 | -2.854900 |
| C | 0.420200  | 2.440400 | -2.314000 |
| H | -0.165500 | 0.409000 | -2.225500 |

|   |           |           |           |
|---|-----------|-----------|-----------|
| C | 0.612500  | 1.130600  | -1.976700 |
| C | 2.482600  | 3.089500  | -1.238900 |
| C | 1.764800  | 0.717000  | -1.226200 |
| C | 1.374200  | 3.437600  | -1.954100 |
| C | 2.700400  | 1.733900  | -0.831100 |
| C | 1.966900  | -0.610000 | -0.791900 |
| H | 1.206200  | 4.475600  | -2.243700 |
| H | 4.505600  | 2.164500  | 0.261200  |
| H | 3.217000  | 3.841600  | -0.943600 |
| C | 2.981000  | -0.917700 | 0.137300  |
| C | 3.097900  | -2.190300 | 0.794300  |
| C | 3.929800  | 0.104500  | 0.497800  |
| H | 5.715700  | 0.574600  | 1.643100  |
| C | 3.782600  | 1.393600  | -0.016700 |
| C | 4.108600  | -2.438600 | 1.679000  |
| H | 2.356900  | -2.966000 | 0.610100  |
| H | 4.165700  | -3.411000 | 2.169700  |
| C | 5.086700  | -1.443400 | 1.976700  |
| H | 5.894300  | -1.670600 | 2.673600  |
| C | 4.992500  | -0.208400 | 1.406600  |
| C | 0.965600  | -1.669600 | -1.259600 |
| H | 0.610700  | -1.339100 | -2.251200 |
| C | 1.601700  | -2.991900 | -1.580800 |
| N | 2.006000  | -4.029200 | -1.881900 |
| N | -0.121500 | -1.744000 | -0.397500 |
| C | -1.125600 | -1.813600 | 0.334700  |
| H | -1.389100 | -2.753400 | 0.868300  |
| H | -5.680700 | -3.408800 | -0.508600 |
| C | -5.313000 | -2.412200 | -0.260200 |
| H | -3.295300 | -3.061400 | -0.130800 |
| C | -3.978600 | -2.217100 | -0.041300 |
| C | -5.784000 | -0.071700 | 0.118700  |
| C | -3.462800 | -0.919500 | 0.294700  |
| C | -6.234300 | -1.325600 | -0.175800 |
| C | -4.393400 | 0.175200  | 0.359000  |
| C | -2.090800 | -0.679400 | 0.524800  |
| H | -7.295300 | -1.502800 | -0.355900 |
| H | -4.626900 | 2.296000  | 0.646500  |
| H | -6.475600 | 0.771400  | 0.174500  |
| C | -1.632900 | 0.615100  | 0.855700  |
| C | -0.272100 | 0.894200  | 1.213800  |
| C | -2.567700 | 1.708500  | 0.873400  |
| H | -2.813200 | 3.852300  | 1.136900  |
| C | -3.920800 | 1.462200  | 0.626500  |
| C | 0.139000  | 2.167800  | 1.490200  |
| H | 0.442900  | 0.074900  | 1.274800  |
| H | 1.181600  | 2.350500  | 1.756600  |
| C | -0.777800 | 3.259400  | 1.435200  |
| H | -0.425300 | 4.270800  | 1.642300  |
| C | -2.093100 | 3.031700  | 1.150900  |

(A)

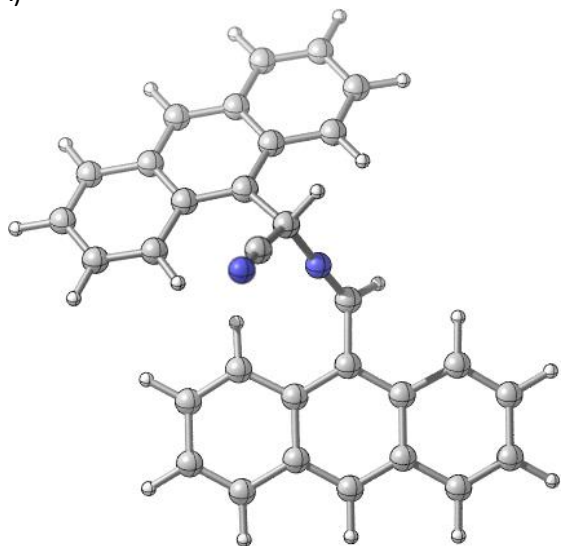

(B)

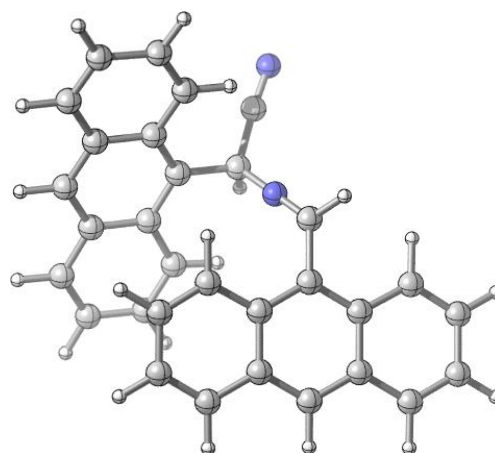

**Figure S13:** Comparison of the molecular structures of (A) **TS-1** and (B) **TS-2**.

**Table 1.** Crystal data and structure refinement of **1**

|                                                              |                                                                              |
|--------------------------------------------------------------|------------------------------------------------------------------------------|
| Identification code                                          | SOH                                                                          |
| Empirical formula                                            | C <sub>31</sub> H <sub>20</sub> N <sub>2</sub>                               |
| Formula weight                                               | 420.49                                                                       |
| Temperature/K                                                | 293(2)                                                                       |
| Crystal system                                               | triclinic                                                                    |
| Space group                                                  | <i>P</i> 1                                                                   |
| <i>a</i> /Å                                                  | 5.18100(10)                                                                  |
| <i>b</i> /Å                                                  | 9.6048(2)                                                                    |
| <i>c</i> /Å                                                  | 11.9887(3)                                                                   |
| $\alpha$ /°                                                  | 67.824(2)                                                                    |
| $\beta$ /°                                                   | 85.664(2)                                                                    |
| $\gamma$ /°                                                  | 78.436(2)                                                                    |
| Volume/Å <sup>3</sup>                                        | 541.24(2)                                                                    |
| <i>Z</i>                                                     | 1                                                                            |
| $\rho_{\text{calc}}$ /cm <sup>3</sup>                        | 1.290                                                                        |
| $\mu$ /mm <sup>-1</sup>                                      | 0.581                                                                        |
| <i>F</i> (000)                                               | 220.0                                                                        |
| Crystal size/mm <sup>3</sup>                                 | 0.113 × 0.062 × 0.053                                                        |
| Radiation                                                    | Cu <i>K</i> $\alpha$ ( $\lambda$ = 1.54184)                                  |
| 2 $\theta$ range for data collection/°                       | 7.964 to 158.56                                                              |
| Index ranges                                                 | -6 ≤ <i>h</i> ≤ 6, -12 ≤ <i>k</i> ≤ 12, -15 ≤ <i>l</i> ≤ 15                  |
| Reflections collected                                        | 17194                                                                        |
| Independent reflections                                      | 4253 [ <i>R</i> <sub>int</sub> = 0.0495, <i>R</i> <sub>sigma</sub> = 0.0328] |
| Data/restraints/parameters                                   | 4253/3/299                                                                   |
| Goodness-of-fit on <i>F</i> <sup>2</sup>                     | 1.145                                                                        |
| Final <i>R</i> indexes [ <i>I</i> ≥ 2 $\sigma$ ( <i>I</i> )] | <i>R</i> <sub>1</sub> = 0.0344, <i>wR</i> <sub>2</sub> = 0.0952              |
| Final <i>R</i> indexes [all data]                            | <i>R</i> <sub>1</sub> = 0.0437, <i>wR</i> <sub>2</sub> = 0.1086              |
| Largest diff. peak/hole / e Å <sup>-3</sup>                  | 0.09/-0.14                                                                   |

**Table 2.** Crystal data and structure refinement of **5d**

|                                                     |                                                                              |
|-----------------------------------------------------|------------------------------------------------------------------------------|
| Empirical formula                                   | C <sub>23</sub> H <sub>15</sub> BrN <sub>2</sub>                             |
| Formula weight                                      | 399.28                                                                       |
| Temperature/K                                       | 100(2)                                                                       |
| Crystal system                                      | monoclinic                                                                   |
| Space group                                         | C2/c                                                                         |
| <i>a</i> /Å                                         | 45.2994(6)                                                                   |
| <i>b</i> /Å                                         | 6.08550(10)                                                                  |
| <i>c</i> /Å                                         | 12.8728(2)                                                                   |
| $\beta$ /°                                          | 92.7350(10)                                                                  |
| Volume/Å <sup>3</sup>                               | 3544.60(9)                                                                   |
| <i>Z</i>                                            | 8                                                                            |
| $\rho_{\text{calc}}$ /cm <sup>3</sup>               | 1.496                                                                        |
| $\mu$ /mm <sup>-1</sup>                             | 3.210                                                                        |
| <i>F</i> (000)                                      | 1616.0                                                                       |
| Crystal size/mm <sup>3</sup>                        | 0.133 × 0.066 × 0.052                                                        |
| Radiation                                           | Cu <i>K</i> α ( $\lambda$ = 1.54184)                                         |
| 2 $\theta$ range for data collection/°              | 7.816 to 159.118                                                             |
| Index ranges                                        | -56 ≤ <i>h</i> ≤ 57, -7 ≤ <i>k</i> ≤ 7, -16 ≤ <i>l</i> ≤ 15                  |
| Reflections collected                               | 24198                                                                        |
| Independent reflections                             | 3794 [ <i>R</i> <sub>int</sub> = 0.0485, <i>R</i> <sub>sigma</sub> = 0.0271] |
| Data/restraints/parameters                          | 3794/1/295                                                                   |
| Goodness-of-fit on <i>F</i> <sup>2</sup>            | 1.057                                                                        |
| Final <i>R</i> indexes [ <i>I</i> ≥ 2σ( <i>I</i> )] | <i>R</i> <sub>1</sub> = 0.0489, <i>wR</i> <sub>2</sub> = 0.1301              |
| Final <i>R</i> indexes [all data]                   | <i>R</i> <sub>1</sub> = 0.0541, <i>wR</i> <sub>2</sub> = 0.1341              |
| Largest diff. peak/hole / e Å <sup>-3</sup>         | 0.58/-0.79                                                                   |



## Halogen bonding in compound **5d**

In the recent decades, halogen bonding (XB) has been attracted the attention of many researchers due to its contribution in many fields of science and engineering. Not long ago, it has been recognized as an important key in supramolecular interaction in crystal engineering as it is more directional than other non-covalent interactions.<sup>1-3</sup> Desiraju and coworkers have classified XB based on the values of the two C–X···X angles  $\theta_1$  and  $\theta_2$  in two categories, type I and type II (Please see Fig. S-14).<sup>4</sup>

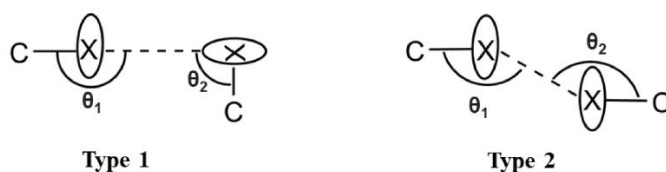

Fig. S-14 Types of halogen...halogen interactions. Type I,  $\theta_1 \approx 180^\circ$  and  $\theta_2 \approx 90^\circ$ . Type II,  $\theta_1 = \theta_2$

Figure S-15 highlights the Br···Br interaction in two independent molecules of **5d**. The distance of Br···Br is 3.54 Å which is less than the sum of the van der Waals radii and consents with the values found in the CSD.<sup>5</sup> The C–Br···Br angle is  $139.6^\circ$ . Subsequently, the halogen bonding in compound **5d** falls under the category of type II.

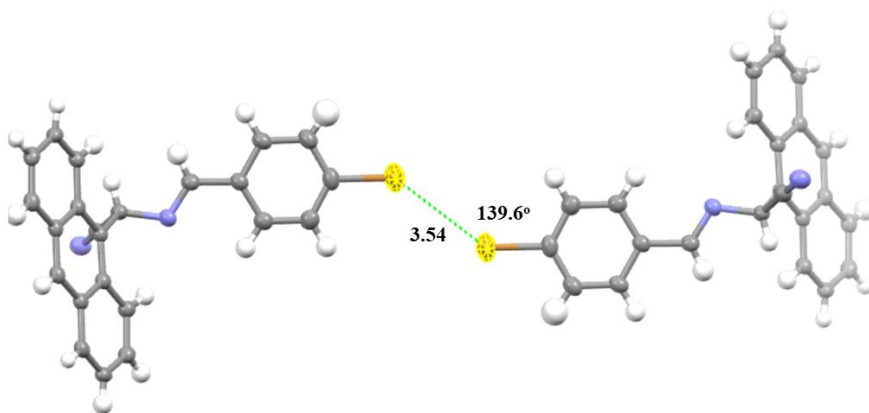

**Fig. S-15** Halogen bonding interaction between the two crystallographically independent molecules of **5d** (Hydrogen atoms are omitted for clarity).

## Notes and references

1 P. Metrangolo, F. Meyer, T. Pilati, G. Resnati and G. Terraneo, *Angewandte Chemie International Edition*, 2008, 47, 6114–6127.

2 L. C. Gilday, S. W. Robinson, T. A. Barendt, M. J. Langton, B. R. Mullaney and P. D. Beer, *Chemical reviews*, 2015, 115, 7118–7195.

3 Metrangolo and G. Resnati, *Halogen bonding: fundamentals and applications*, Springer, 2008, vol. 126

4 D. ShekharáReddy, B. SatisháGoud, A. DavidáRae et al., *Journal of the Chemical Society, Perkin Transactions 2*, 1994, 2353–2360.

5 A. v. Bondi, *The Journal of physical chemistry*, 1964, 68, 441–451.
